# Supplementary material for: Anharmonicity-induced thermal rectification of a single diblock molecular junction inspired by the Aviram–Ratner diode
Source: Royal Society of Chemistry journal article supplement (doi:10.1039/d4nr04716h), 2025-01-01
Supplement: d4nr04716h1.pdf [file d4nr04716h1.pdf]

## Supplementary Information for

### Anharmonicity-induced thermal rectification of a single diblock molecule inspired by the Aviram–Ratner diode

*Hisao Nakamura\* and Naoyuki Karasawa*

*National Institute of Advanced Industrial Science and Technology (AIST),*

*Tsukuba Central 2, 1-1-1 Umezono, Tsukuba, Ibaraki 305-8568, Japan*

\* [hs-nakamura@aist.go.jp](mailto:hs-nakamura@aist.go.jp)

#### S1. Computational details and structure of the molecular junctions

All the atomic structures and force constant matrices were obtained using density functional theory with the functional PBEsol exchange-correlation (XC). We adopted the single zeta plus polarization (SZP) level basis set and performed practical calculations using the SIESTA program package<sup>1</sup>. The left/right electrodes of a molecular junction consist of six atomic layers of  $3 \times 3$  Au(111), where the bridge site is considered as the adsorption site of the molecule. All atomic positions were relaxed to determine the energetically optimized structure, while the lattice constant was fixed. The frozen phonon approximation was applied for force constant calculations. The resulting atomic structures of  $C_2Ph_2$ ,  $CHO_2PhPy$ , and  $(CHO_2)_2Ph_2$  molecular junctions are shown in Figure S1-1.

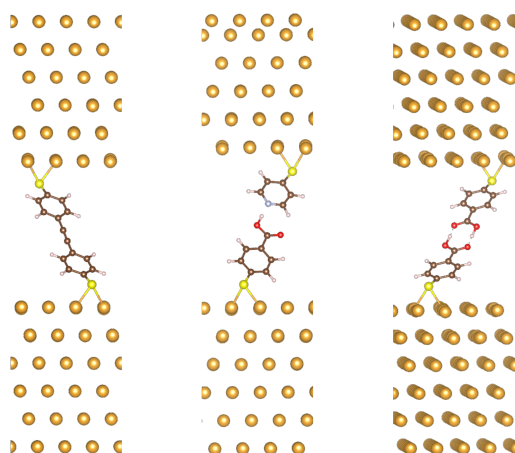

**Figure S1-1.** Structures of the molecular junctions. The left, middle, and right panels show the  $C_2Ph_2$ ,  $CHO_2PhPy$ , and  $(CHO_2)_2Ph_2$  junctions.

All of the atomic coordinates are given below as xyz format.

C<sub>2</sub>Ph<sub>2</sub>

CRYSTAL

PRIMVEC

8.6520 0.0000 0.0000

4.3260 7.4929 0.0000

0.0000 0.0000 38.464

PRIMCOORD

123 1

|    |         |         |         |
|----|---------|---------|---------|
| 79 | 0.0000  | 0.0000  | 0.0000  |
| 79 | 2.8840  | 0.0000  | 0.0000  |
| 79 | 5.7680  | 0.0000  | 0.0000  |
| 79 | 1.4420  | 2.4976  | 0.0000  |
| 79 | 4.3260  | 2.4976  | 0.0000  |
| 79 | 7.2100  | 2.4976  | 0.0000  |
| 79 | 2.8840  | 4.9952  | 0.0000  |
| 79 | 5.7680  | 4.9952  | 0.0000  |
| 79 | 8.6520  | 4.9952  | 0.0000  |
| 79 | 0.0025  | 1.5958  | 2.5246  |
| 79 | 2.8860  | 1.5966  | 2.5220  |
| 79 | 5.7711  | 1.5964  | 2.5222  |
| 79 | 1.4451  | 4.0925  | 2.5186  |
| 79 | 4.3285  | 4.0929  | 2.5175  |
| 79 | 7.2119  | 4.0924  | 2.5186  |
| 79 | 2.8863  | 6.5915  | 2.5206  |
| 79 | 5.7708  | 6.5915  | 2.5205  |
| 79 | 8.6545  | 6.5918  | 2.5205  |
| 79 | 1.4492  | 0.6985  | 5.0378  |
| 79 | 4.3315  | 0.7000  | 5.0446  |
| 79 | 7.2135  | 0.6983  | 5.0381  |
| 79 | 2.8920  | 3.1924  | 5.0439  |
| 79 | 5.7709  | 3.1925  | 5.0439  |
| 79 | 8.6573  | 3.1966  | 5.0373  |
| 79 | 4.3314  | 5.6896  | 5.0288  |
| 79 | 7.2165  | 5.6934  | 5.0329  |
| 79 | 10.0982 | 5.6931  | 5.0332  |
| 79 | 0.0076  | -0.1954 | 7.5362  |
| 79 | 2.8924  | -0.1948 | 7.5601  |
| 79 | 5.7750  | -0.1950 | 7.5607  |
| 79 | 1.4514  | 2.2977  | 7.5562  |
| 79 | 4.3337  | 2.2849  | 7.5964  |
| 79 | 7.2159  | 2.2979  | 7.5563  |
| 79 | 2.8900  | 4.7975  | 7.5383  |
| 79 | 5.7769  | 4.7977  | 7.5382  |
| 79 | 8.6595  | 4.7985  | 7.5513  |
| 79 | 0.0087  | 1.4137  | 10.0724 |
| 79 | 2.8759  | 1.4075  | 10.1217 |
| 79 | 5.7934  | 1.4076  | 10.1219 |
| 79 | 1.4554  | 3.9147  | 10.0405 |
| 79 | 4.3345  | 3.9017  | 10.0176 |
| 79 | 7.2138  | 3.9147  | 10.0406 |
| 79 | 2.8930  | 6.4193  | 10.0429 |
| 79 | 5.7762  | 6.4190  | 10.0424 |
| 79 | 8.6605  | 6.4174  | 10.0522 |
| 79 | 1.5009  | 0.5836  | 12.6515 |
| 79 | 4.3347  | 0.5748  | 12.6362 |
| 79 | 7.1682  | 0.5854  | 12.6530 |
| 79 | 2.8962  | 3.0851  | 12.6284 |

|    |         |        |         |
|----|---------|--------|---------|
| 79 | 5.7731  | 3.0856 | 12.6280 |
| 79 | 8.6610  | 3.0918 | 12.5499 |
| 79 | 4.3347  | 5.5327 | 12.4878 |
| 79 | 7.2245  | 5.5631 | 12.5868 |
| 79 | 10.0978 | 5.5634 | 12.5865 |
| 16 | 0.0093  | 0.2442 | 14.7023 |
| 6  | 0.0216  | 1.7617 | 15.6233 |
| 1  | 2.2035  | 1.8761 | 15.6839 |
| 1  | -2.1578 | 1.9269 | 15.6710 |
| 6  | 1.2536  | 2.2962 | 16.0768 |
| 6  | -1.2005 | 2.3249 | 16.0693 |
| 6  | 1.2616  | 3.3154 | 17.0308 |
| 6  | -1.1899 | 3.3444 | 17.0230 |
| 1  | 2.2204  | 3.7190 | 17.4124 |
| 1  | -2.1416 | 3.7708 | 17.3989 |
| 6  | 0.0403  | 3.8246 | 17.5506 |
| 6  | 0.0462  | 4.7676 | 18.6178 |
| 6  | 0.0460  | 5.5270 | 19.5933 |
| 6  | 0.0390  | 6.4269 | 20.6965 |
| 1  | 2.2186  | 6.4868 | 20.8727 |
| 1  | -2.1435 | 6.5140 | 20.8120 |
| 6  | 1.2602  | 6.8809 | 21.2658 |
| 6  | -1.1916 | 6.8962 | 21.2320 |
| 6  | 1.2532  | 7.8300 | 22.2897 |
| 6  | -1.2011 | 7.8449 | 22.2559 |
| 1  | 2.2029  | 8.2040 | 22.7284 |
| 1  | -2.1580 | 8.2305 | 22.6683 |
| 6  | 0.0224  | 8.3515 | 22.7595 |
| 16 | 0.0140  | 9.8013 | 23.7816 |
| 79 | 0.0116  | 1.8839 | 25.8247 |
| 79 | 2.8449  | 1.8720 | 25.8111 |
| 79 | 5.8298  | 1.8728 | 25.8120 |
| 79 | 1.4479  | 4.3883 | 25.8830 |
| 79 | 4.3371  | 4.4261 | 25.9941 |
| 79 | 7.2270  | 4.3886 | 25.8832 |
| 79 | 2.8973  | 6.8684 | 25.8336 |
| 79 | 5.7773  | 6.8681 | 25.8325 |
| 79 | 8.6633  | 6.8621 | 25.9077 |
| 79 | 1.4695  | 1.0616 | 28.3395 |
| 79 | 4.3362  | 1.0561 | 28.3917 |
| 79 | 7.2029  | 1.0617 | 28.3392 |
| 79 | 2.8944  | 3.5430 | 28.4291 |
| 79 | 5.7787  | 3.5430 | 28.4292 |
| 79 | 8.6624  | 3.5443 | 28.4142 |
| 79 | 4.3363  | 6.0618 | 28.4500 |
| 79 | 7.2161  | 6.0479 | 28.4236 |
| 79 | 10.1083 | 6.0477 | 28.4239 |
| 79 | 0.0088  | 0.2003 | 30.8647 |
| 79 | 2.8909  | 0.1866 | 30.9059 |
| 79 | 5.7791  | 0.1866 | 30.9061 |
| 79 | 1.4496  | 2.6789 | 30.9066 |
| 79 | 4.3349  | 2.6796 | 30.9313 |
| 79 | 7.2202  | 2.6789 | 30.9068 |
| 79 | 2.8914  | 5.1799 | 30.9289 |
| 79 | 5.7785  | 5.1798 | 30.9289 |
| 79 | 8.6608  | 5.1792 | 30.9149 |
| 79 | 0.0067  | 1.7891 | 33.4207 |
| 79 | 2.8889  | 1.7907 | 33.4265 |
| 79 | 5.7765  | 1.7908 | 33.4270 |
| 79 | 1.4476  | 4.2891 | 33.4334 |
| 79 | 4.3328  | 4.2926 | 33.4383 |
| 79 | 7.2181  | 4.2892 | 33.4335 |

|    |         |        |         |
|----|---------|--------|---------|
| 79 | 2.8931  | 6.7897 | 33.4204 |
| 79 | 5.7722  | 6.7897 | 33.4200 |
| 79 | 8.6588  | 6.7858 | 33.4271 |
| 79 | 1.4457  | 0.8959 | 35.9424 |
| 79 | 4.3292  | 0.8969 | 35.9392 |
| 79 | 7.2125  | 0.8958 | 35.9426 |
| 79 | 2.8870  | 3.3936 | 35.9444 |
| 79 | 5.7715  | 3.3937 | 35.9446 |
| 79 | 8.6552  | 3.3928 | 35.9457 |
| 79 | 4.3291  | 5.8927 | 35.9473 |
| 79 | 7.2124  | 5.8932 | 35.9455 |
| 79 | 10.0977 | 5.8930 | 35.9458 |

(CHO<sub>2</sub>)PhPy

CRYSTAL  
PRIMVEC

|        |        |        |
|--------|--------|--------|
| 8.6520 | 0.0000 | 0.0000 |
| 4.3260 | 7.4929 | 0.0000 |
| 0.0000 | 0.0000 | 39.68  |

PRIMCOORD

125 1

|    |         |         |         |
|----|---------|---------|---------|
| 79 | 0.0000  | 0.0000  | 0.0000  |
| 79 | 2.8840  | 0.0000  | 0.0000  |
| 79 | 5.7680  | 0.0000  | 0.0000  |
| 79 | 1.4420  | 2.4976  | 0.0000  |
| 79 | 4.3260  | 2.4976  | 0.0000  |
| 79 | 7.2100  | 2.4976  | 0.0000  |
| 79 | 2.8840  | 4.9952  | 0.0000  |
| 79 | 5.7680  | 4.9952  | 0.0000  |
| 79 | 8.6520  | 4.9952  | 0.0000  |
| 79 | 0.0061  | 1.6024  | 2.5278  |
| 79 | 2.8896  | 1.6034  | 2.5256  |
| 79 | 5.7744  | 1.6035  | 2.5271  |
| 79 | 1.4493  | 4.0992  | 2.5221  |
| 79 | 4.3325  | 4.0992  | 2.5221  |
| 79 | 7.2154  | 4.0988  | 2.5228  |
| 79 | 2.8899  | 6.5983  | 2.5239  |
| 79 | 5.7743  | 6.5983  | 2.5234  |
| 79 | 8.6581  | 6.5988  | 2.5218  |
| 79 | 1.4532  | 0.7150  | 5.0447  |
| 79 | 4.3352  | 0.7170  | 5.0508  |
| 79 | 7.2173  | 0.7155  | 5.0452  |
| 79 | 2.8961  | 3.2089  | 5.0513  |
| 79 | 5.7745  | 3.2095  | 5.0541  |
| 79 | 8.6614  | 3.2119  | 5.0432  |
| 79 | 4.3351  | 5.7066  | 5.0355  |
| 79 | 7.2204  | 5.7100  | 5.0373  |
| 79 | 10.1020 | 5.7099  | 5.0370  |
| 79 | 0.0107  | -0.1591 | 7.5469  |
| 79 | 2.8948  | -0.1578 | 7.5699  |
| 79 | 5.7781  | -0.1580 | 7.5679  |
| 79 | 1.4545  | 2.3321  | 7.5692  |
| 79 | 4.3355  | 2.3206  | 7.6142  |
| 79 | 7.2187  | 2.3326  | 7.5707  |
| 79 | 2.8933  | 4.8337  | 7.5459  |
| 79 | 5.7802  | 4.8344  | 7.5479  |
| 79 | 8.6625  | 4.8340  | 7.5538  |
| 79 | 0.0121  | 1.4787  | 10.0997 |
| 79 | 2.8742  | 1.4726  | 10.1486 |

|    |         |        |         |
|----|---------|--------|---------|
| 79 | 5.8000  | 1.4750 | 10.1433 |
| 79 | 1.4583  | 3.9830 | 10.0438 |
| 79 | 4.3389  | 3.9693 | 10.0292 |
| 79 | 7.2186  | 3.9827 | 10.0470 |
| 79 | 2.8979  | 6.4887 | 10.0555 |
| 79 | 5.7795  | 6.4892 | 10.0570 |
| 79 | 8.6660  | 6.4867 | 10.0552 |
| 79 | 1.5093  | 0.7055 | 12.7155 |
| 79 | 4.3463  | 0.6816 | 12.6455 |
| 79 | 7.1833  | 0.6991 | 12.7117 |
| 79 | 2.9078  | 3.1964 | 12.6201 |
| 79 | 5.7836  | 3.1940 | 12.6369 |
| 79 | 8.6684  | 3.2043 | 12.5559 |
| 79 | 4.3444  | 5.6445 | 12.4994 |
| 79 | 7.2312  | 5.6780 | 12.5869 |
| 79 | 10.1088 | 5.6760 | 12.5955 |
| 16 | 0.0402  | 0.3193 | 14.7515 |
| 6  | -0.0012 | 1.7052 | 15.8724 |
| 1  | 1.7702  | 2.7510 | 15.1129 |
| 1  | -1.7697 | 0.8513 | 16.8442 |
| 6  | 0.9832  | 2.7223 | 15.9025 |
| 6  | -0.9991 | 1.6497 | 16.8764 |
| 6  | 0.9823  | 3.6539 | 16.9502 |
| 6  | -0.9837 | 2.5829 | 17.9198 |
| 1  | 1.7500  | 4.4529 | 17.0204 |
| 1  | -1.7432 | 2.5495 | 18.7265 |
| 6  | 0.0132  | 3.5790 | 17.9715 |
| 6  | 0.0875  | 4.5445 | 19.1255 |
| 8  | 0.9458  | 5.4397 | 19.1729 |
| 8  | -0.8331 | 4.3095 | 20.0523 |
| 1  | -0.7350 | 5.0108 | 20.8703 |
| 7  | -0.6175 | 5.9841 | 21.9812 |
| 1  | 1.0355  | 6.6985 | 20.9501 |
| 1  | -2.2847 | 5.3766 | 23.1092 |
| 6  | 0.3976  | 6.8719 | 21.8515 |
| 6  | -1.4629 | 6.1224 | 23.0268 |
| 6  | 0.6043  | 7.9225 | 22.7560 |
| 6  | -1.3494 | 7.1538 | 23.9667 |
| 1  | 1.4480  | 8.6275 | 22.6102 |
| 1  | -2.0973 | 7.2460 | 24.7915 |
| 6  | -0.2918 | 8.0832 | 23.8401 |
| 16 | -0.1244 | 9.5343 | 24.8588 |
| 79 | -0.0456 | 1.7633 | 27.0399 |
| 79 | 2.8013  | 1.7510 | 26.9823 |
| 79 | 5.7670  | 1.7400 | 26.9366 |
| 79 | 1.3992  | 4.2608 | 27.0874 |
| 79 | 4.2897  | 4.2868 | 27.1614 |
| 79 | 7.1711  | 4.2556 | 27.0713 |
| 79 | 2.8489  | 6.7421 | 27.0412 |
| 79 | 5.7239  | 6.7431 | 27.0904 |
| 79 | 8.6167  | 6.7307 | 27.1420 |
| 79 | 1.4365  | 0.9728 | 29.5457 |
| 79 | 4.3012  | 0.9660 | 29.5811 |
| 79 | 7.1645  | 0.9666 | 29.5391 |
| 79 | 2.8591  | 3.4489 | 29.6196 |
| 79 | 5.7404  | 3.4460 | 29.6074 |
| 79 | 8.6248  | 3.4522 | 29.6243 |
| 79 | 4.2985  | 5.9653 | 29.6550 |
| 79 | 7.1804  | 5.9523 | 29.6463 |
| 79 | 10.0728 | 5.9530 | 29.6393 |
| 79 | -0.0197 | 0.1328 | 32.0715 |
| 79 | 2.8618  | 0.1223 | 32.1174 |

|    |         |        |         |
|----|---------|--------|---------|
| 79 | 5.7488  | 0.1225 | 32.1080 |
| 79 | 1.4214  | 2.6122 | 32.1144 |
| 79 | 4.3054  | 2.6138 | 32.1264 |
| 79 | 7.1888  | 2.6130 | 32.1035 |
| 79 | 2.8615  | 5.1113 | 32.1338 |
| 79 | 5.7481  | 5.1114 | 32.1319 |
| 79 | 8.6317  | 5.1129 | 32.1310 |
| 79 | -0.0148 | 1.7491 | 34.6287 |
| 79 | 2.8681  | 1.7509 | 34.6385 |
| 79 | 5.7555  | 1.7507 | 34.6305 |
| 79 | 1.4270  | 4.2484 | 34.6456 |
| 79 | 4.3117  | 4.2511 | 34.6434 |
| 79 | 7.1965  | 4.2477 | 34.6403 |
| 79 | 2.8726  | 6.7494 | 34.6244 |
| 79 | 5.7512  | 6.7484 | 34.6301 |
| 79 | 8.6386  | 6.7466 | 34.6393 |
| 79 | 1.4348  | 0.8787 | 37.1553 |
| 79 | 4.3194  | 0.8800 | 37.1532 |
| 79 | 7.2023  | 0.8788 | 37.1519 |
| 79 | 2.8770  | 3.3770 | 37.1579 |
| 79 | 5.7613  | 3.3766 | 37.1547 |
| 79 | 8.6442  | 3.3763 | 37.1578 |
| 79 | 4.3185  | 5.8758 | 37.1570 |
| 79 | 7.2020  | 5.8757 | 37.1575 |
| 79 | 10.0882 | 5.8764 | 37.1571 |

(CHO<sub>2</sub>)<sub>2</sub>Ph<sub>2</sub>

CRYSTAL  
PRIMVEC

|        |        |         |
|--------|--------|---------|
| 8.6520 | 0.0000 | 0.0000  |
| 4.3260 | 7.4929 | 0.0000  |
| 0.0000 | 0.0000 | 39.0000 |

PRIMCOORD

129 1

|    |         |        |        |
|----|---------|--------|--------|
| 79 | 0.0000  | 0.0000 | 0.0000 |
| 79 | 2.8840  | 0.0000 | 0.0000 |
| 79 | 5.7680  | 0.0000 | 0.0000 |
| 79 | 1.4420  | 2.4976 | 0.0000 |
| 79 | 4.3260  | 2.4976 | 0.0000 |
| 79 | 7.2100  | 2.4976 | 0.0000 |
| 79 | 2.8840  | 4.9952 | 0.0000 |
| 79 | 5.7680  | 4.9952 | 0.0000 |
| 79 | 8.6520  | 4.9952 | 0.0000 |
| 79 | -0.0179 | 1.6545 | 2.5200 |
| 79 | 2.8667  | 1.6551 | 2.5267 |
| 79 | 5.7488  | 1.6540 | 2.5269 |
| 79 | 1.4261  | 4.1510 | 2.5224 |
| 79 | 4.3068  | 4.1516 | 2.5272 |
| 79 | 7.1917  | 4.1522 | 2.5147 |
| 79 | 2.8664  | 6.6501 | 2.5230 |
| 79 | 5.7499  | 6.6501 | 2.5197 |
| 79 | 8.6340  | 6.6523 | 2.5219 |
| 79 | 1.3902  | 0.8059 | 5.0364 |
| 79 | 4.2731  | 0.8108 | 5.0579 |
| 79 | 7.1566  | 0.8061 | 5.0403 |
| 79 | 2.8358  | 3.3001 | 5.0592 |
| 79 | 5.7142  | 3.3023 | 5.0465 |
| 79 | 8.5997  | 3.3035 | 5.0293 |

|    |         |         |         |
|----|---------|---------|---------|
| 79 | 4.2738  | 5.7996  | 5.0405  |
| 79 | 7.1581  | 5.8007  | 5.0288  |
| 79 | 10.0423 | 5.8010  | 5.0355  |
| 79 | -0.1135 | -0.0592 | 7.5529  |
| 79 | 2.7708  | -0.0577 | 7.5472  |
| 79 | 5.6591  | -0.0537 | 7.5641  |
| 79 | 1.3298  | 2.4379  | 7.5485  |
| 79 | 4.2241  | 2.4453  | 7.6314  |
| 79 | 7.0967  | 2.4379  | 7.5599  |
| 79 | 2.7778  | 4.9371  | 7.5656  |
| 79 | 5.6541  | 4.9364  | 7.5597  |
| 79 | 8.5413  | 4.9375  | 7.5393  |
| 79 | -0.1907 | 1.5637  | 10.0635 |
| 79 | 2.7054  | 1.5706  | 10.0544 |
| 79 | 5.5996  | 1.5562  | 10.1460 |
| 79 | 1.2598  | 4.0563  | 10.0287 |
| 79 | 4.1402  | 4.0850  | 10.1492 |
| 79 | 7.0220  | 4.0620  | 10.0469 |
| 79 | 2.7034  | 6.5645  | 10.0850 |
| 79 | 5.5770  | 6.5592  | 10.0618 |
| 79 | 8.4616  | 6.5684  | 10.0269 |
| 79 | 1.1875  | 0.6965  | 12.5461 |
| 79 | 4.0387  | 0.6828  | 12.6353 |
| 79 | 6.9045  | 0.7263  | 12.6797 |
| 79 | 2.6019  | 3.1726  | 12.6379 |
| 79 | 5.5060  | 3.1890  | 12.6616 |
| 79 | 8.3847  | 3.1922  | 12.6068 |
| 79 | 4.0742  | 5.6329  | 12.6852 |
| 79 | 6.9487  | 5.6800  | 12.5972 |
| 79 | 9.8010  | 5.6684  | 12.5093 |
| 16 | -1.0516 | -0.5927 | 14.7571 |
| 6  | 0.3560  | 0.2512  | 15.4579 |
| 1  | 1.6351  | -1.5248 | 15.4263 |
| 1  | -0.6928 | 2.1665  | 15.5894 |
| 6  | 1.5347  | -0.4730 | 15.7726 |
| 6  | 0.2242  | 1.6037  | 15.8649 |
| 6  | 2.5368  | 0.1313  | 16.5400 |
| 6  | 1.2297  | 2.1982  | 16.6353 |
| 1  | 3.4566  | -0.4171 | 16.8284 |
| 1  | 1.1368  | 3.2429  | 16.9955 |
| 6  | 2.3708  | 1.4535  | 17.0021 |
| 6  | 3.3584  | 2.0161  | 17.9654 |
| 8  | 4.3412  | 1.2963  | 18.3229 |
| 8  | 3.1103  | 3.2090  | 18.4109 |
| 1  | 3.8092  | 3.5108  | 19.2421 |
| 1  | 5.0791  | 1.7261  | 19.3157 |
| 8  | 5.7513  | 2.0094  | 20.1713 |
| 8  | 4.5386  | 3.9367  | 20.2379 |
| 6  | 5.4827  | 3.1891  | 20.6411 |
| 6  | 6.3937  | 3.6943  | 21.7054 |
| 1  | 7.6146  | 1.8951  | 21.7161 |
| 1  | 5.2959  | 5.5571  | 21.9048 |
| 6  | 7.4945  | 2.9182  | 22.1260 |
| 6  | 6.1885  | 4.9859  | 22.2343 |
| 6  | 8.4306  | 3.4582  | 23.0145 |
| 6  | 7.1201  | 5.5353  | 23.1217 |
| 1  | 9.3189  | 2.8744  | 23.3376 |
| 1  | 6.9917  | 6.5619  | 23.5273 |
| 6  | 8.2715  | 4.7885  | 23.4784 |
| 16 | 9.6409  | 5.5932  | 24.2863 |
| 79 | 0.1265  | 1.7527  | 26.3914 |
| 79 | 3.0054  | 1.7554  | 26.3577 |

|    |         |        |         |
|----|---------|--------|---------|
| 79 | 5.9089  | 1.7715 | 26.3773 |
| 79 | 1.6036  | 4.2160 | 26.3479 |
| 79 | 4.4728  | 4.2605 | 26.3748 |
| 79 | 7.3240  | 4.2468 | 26.4470 |
| 79 | 3.0414  | 6.7704 | 26.5121 |
| 79 | 5.8898  | 6.7559 | 26.3991 |
| 79 | 8.7605  | 6.8030 | 26.3504 |
| 79 | 1.5167  | 0.8938 | 28.9540 |
| 79 | 4.3989  | 0.8748 | 28.8758 |
| 79 | 7.2805  | 0.9021 | 28.9800 |
| 79 | 2.9420  | 3.3988 | 28.8758 |
| 79 | 5.8361  | 3.3876 | 28.9527 |
| 79 | 8.7308  | 3.3944 | 28.9371 |
| 79 | 4.4058  | 5.8807 | 28.9804 |
| 79 | 7.2899  | 5.8903 | 28.9387 |
| 79 | 10.1653 | 5.8864 | 28.9383 |
| 79 | 0.0426  | 0.0419 | 31.4611 |
| 79 | 2.9289  | 0.0427 | 31.4428 |
| 79 | 5.8058  | 0.0422 | 31.4522 |
| 79 | 1.4862  | 2.5414 | 31.4423 |
| 79 | 4.3597  | 2.5343 | 31.3885 |
| 79 | 7.2542  | 2.5415 | 31.4527 |
| 79 | 2.9247  | 5.0330 | 31.4522 |
| 79 | 5.8132  | 5.0378 | 31.4534 |
| 79 | 8.6963  | 5.0381 | 31.4530 |
| 79 | 0.0216  | 1.6906 | 33.9696 |
| 79 | 2.9070  | 1.6922 | 33.9562 |
| 79 | 5.7866  | 1.6944 | 33.9507 |
| 79 | 1.4636  | 4.1880 | 33.9652 |
| 79 | 4.3486  | 4.1848 | 33.9506 |
| 79 | 7.2304  | 4.1881 | 33.9636 |
| 79 | 2.9060  | 6.6867 | 33.9729 |
| 79 | 5.7891  | 6.6868 | 33.9701 |
| 79 | 8.6725  | 6.6873 | 33.9657 |
| 79 | 1.4507  | 0.8422 | 36.4832 |
| 79 | 4.3348  | 0.8423 | 36.4753 |
| 79 | 7.2163  | 0.8431 | 36.4812 |
| 79 | 2.8928  | 3.3398 | 36.4749 |
| 79 | 5.7754  | 3.3389 | 36.4769 |
| 79 | 8.6596  | 3.3394 | 36.4800 |
| 79 | 4.3342  | 5.8347 | 36.4810 |
| 79 | 7.2177  | 5.8368 | 36.4802 |
| 79 | 10.1010 | 5.8365 | 36.4806 |



## S2. Details of the procedure to parameterize the anharmonic self-energy

We summarize the step-by-step procedure to evaluate the color noise term  $\tau_a^{-1}(\omega, T)$  given in Section II.

- (1) Calculate the phonon energy and normal mode vectors defined on the molecular junction's unit cell (i.e., Bloch state of phonon) using the frozen phonon approximation.
- (2) Set the initial condition of each sampling based on the law of equipartition of energy, where the temperature is set to  $T$ . Each normal mode in a sampling state receives energy randomly distributed between kinetic energy (momentum in the normal model) and harmonic potential energy (amplitude in the normal mode).
- (3) Transform the coordinates and velocities of the normal modes to real space for all normal modes defined over the supercell. This supercell must be the same as the cell used for the force constant matrix in the frozen phonon calculation.
- (4) Carry out NVE-MD of the sampling states in real space and evaluate the relaxation time constants of all normal modes.

Since the initial parameter  $\tau_{0a}$  is defined for each atomic species, not normal mode, we need to identify the normal modes dominated by the atomic species  $a$  and consider the averaged value of the vibrational relaxation times. Thus, the next step is:

- (5) Select the normal modes to evaluate the parameter of atomic species  $a$  based on the following criteria:

$$c_1 < \frac{\sum_{\mu \notin I_{Au}} (q_\mu^Q)^2}{\sum_{\mu} (q_\mu^Q)^2}, \quad c_2 < \frac{\sum_{\mu \notin I_a} (q_\mu^Q)^2}{\sum_{\mu \notin I_{Au}} (q_\mu^Q)^2}, \quad (S1)$$

where  $Q$  is the label of the examined normal mode and  $q_\mu^Q$  is the component of its normal mode vector. The criteria values ( $c_1, c_2$ ) are (0.2, 0.4) for C and H atoms, while ( $c_1, c_2$ ) are taken as (0.05, 0.1) for O, N, and S atoms, respectively.

Here, we did not refer to the normal modes with frequencies higher than 36.0 THz since such high-frequency modes are not coupled with the electrodes and are not crucial for thermal transport. Typically, the frequencies of the normal modes that satisfy the criteria Eq. (S1) are lower than 10.0 Hz.

(6) Evaluate the relaxation time constant of the selected normal modes. Then set the initial  $\tau_{0a}^{-1}$  by averaging over the selected normal modes. One can use the following weight to average the values of each selected mode,  $Q_\alpha$ .

$$w_{Q_\alpha} = \frac{\sum_{\mu \in I_\alpha} (q_\mu^{Q=Q_\alpha})^2}{\sum_Q \sum_{\mu \in I_\alpha} (q_\mu^Q)^2} \quad (\text{S2})$$

(7) Evaluate the set of approximated random forces  $\xi_\mu(t)$  by the MD results as follows:

$$\xi_\mu(t) \sim F_\mu + \frac{1}{2} \sum_{\nu} K_{\mu\nu} x_\nu + M_\mu \Gamma_{0a} \frac{dx_\mu}{dt}. \quad (\text{S3})$$

$F_\mu$  is the force acting on each DoF during the MD calculation like position and velocity. The colored noise and the resulting  $\tau_a^{-1}(\omega, T)$  are determined as a function of  $\omega$  and  $T$  via the fluctuation-dissipation theorem.

Note that we used the value of  $\tau_{0a}^{-1} (= \Gamma_{0a})$  obtained in step (6), where the temperature was set to 400 K, as the temperature-independent constant. Thus, the next cycle of calculations to determine the color noise at different temperatures requires only steps (2), (3), (4), and (7).

Here, we performed first principles MD in the above protocol, where SIESTA program package was used. Adopted basis set and XC functionals are same with those used for atomic structure optimization given in S1. MD trajectories were run typically for 20 ps, which is much shorter than time scale require for thermal transport calculation. The time step was set to 2.0 fs.

### S3. The calculated plot of $\tau_a^{-1}(\omega, T)$ and their model functions

As stated in Sections II and III, the calculated  $\tau_a^{-1}(\omega, T)$  is expressed by the model function:

$$\tau_a^{-1}(\omega, T) \sim \Gamma_{0a} f_a(\omega, T)$$

$$f_a(\omega, T) = A \sinh(\alpha_T T) + B \tanh(\beta_T T) \sinh(\alpha_\omega \omega) \quad (\text{S4})$$

Here, we found that the transmission coefficient by ballistic approximation is almost zero when the energy (frequency) is higher than 7.0 THz. This is consistent with the phonon DOS of Au bulk or (111) zero above 5.0 THz. Thus, we used data only in the range  $0 < \omega < 7.0$  Hz to determine the model parameters. The resulting color noise of the atomic species C, i.e., the term  $\tau_{a=C}^{-1}(\omega, T)/\Gamma_{0a}$  and the related model function  $f_{a=C}(\omega, T)$ , are plotted in Figure S3-1.

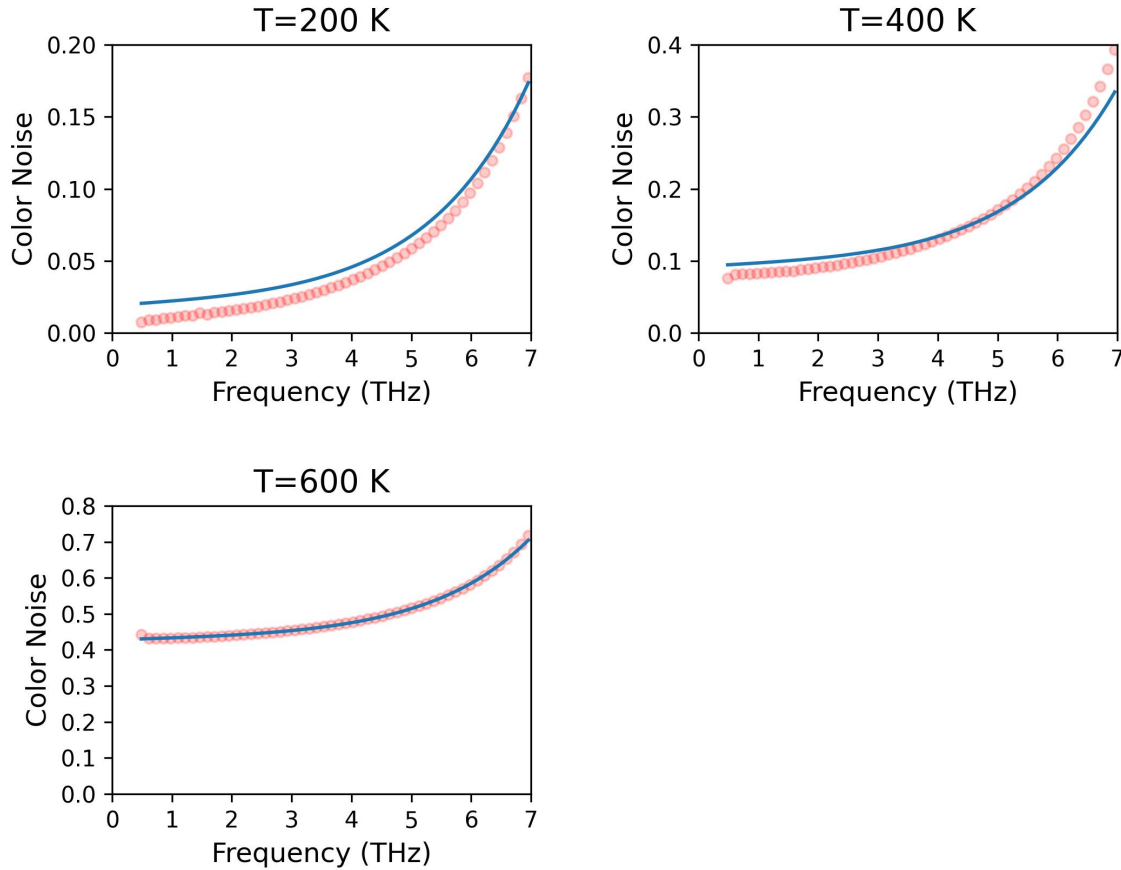

**Figure S3-1.** Plots of the color noise related to anharmonicity for atomic species C. All plots are a function of frequency, with the temperature set to 200 K (top left), 400 K (top right), and 600 K (bottom left). The thin red circles represent the calculated results from MD data, and the blue lines represent the plots by the model function.

#### S4. Phonon DOS and transmission coefficient of elastic term with and without anharmonic effect

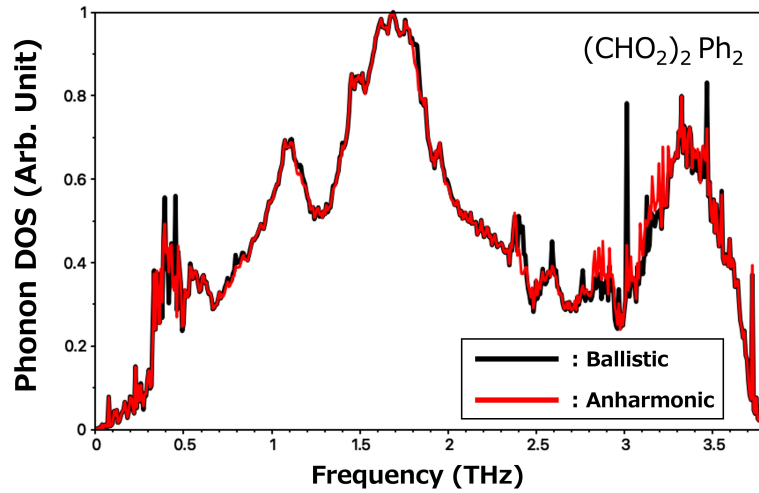

**Figure S4-1.** Plots of the phonon DOS of  $(\text{CHO}_2)_2\text{Ph}_2$  junction. The black line is the result of ballistic approximation, i.e., DOS without anharmonic effect. The red line represents DOS including anharmonic effect where temperature is set to 500 K.

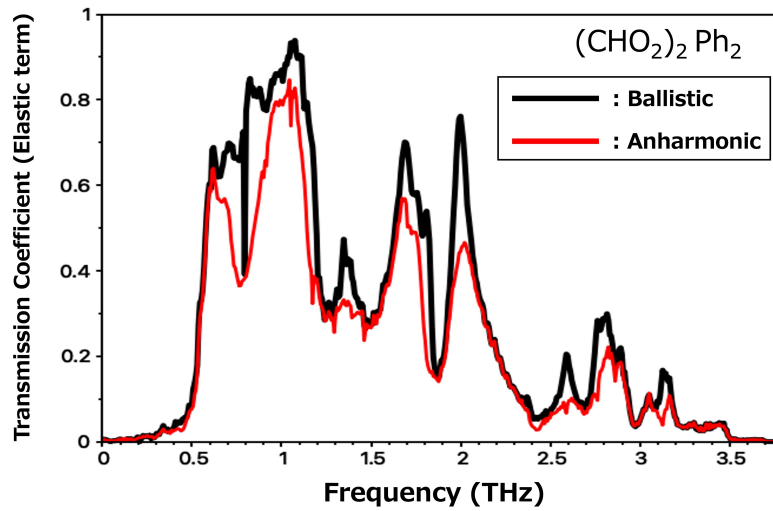

**Figure S4-2.** Plots of the transmission coefficient of elastic term in Eq. (4),  $\mathcal{J}^{ela}$ , of  $(\text{CHO}_2)_2\text{Ph}_2$  junction. The black and red lines are the result of ballistic approximation and that with anharmonic effect of 500K, respectively.

## S5. Electric conductance and electric thermal conductance

Thermal conductance by electric transport of a molecular junction is evaluated as

$$\kappa_e = \frac{1}{2\pi T} \left( L^{(2)} - \frac{(L^{(1)})^2}{L^{(0)}} \right) \quad (\text{S5})$$

where  $e$  and  $\hbar$  are set to 1. The coefficient  $L^{(n)}$  can be calculated by integral of electron energy  $E$ ,

$$L^{(n)} = \frac{1}{2\pi} \int dE \left( -\frac{\partial f_{FD}(E,T)}{\partial E} \right) (E - E_F)^n T_e(E) \quad (\text{S6})$$

$f_{FD}(E,T)$  is Fermi-Dirac function and  $E_F$  is Fermi level of the system.<sup>2</sup>  $T_e(E)$  is the transmission coefficient of *electron*. The transmission coefficient can be calculated NEGF combined with DFT (NEGF-DFT), where Green's function is electric Green's function by DFT instead of phonon Green's function. Details of NEGF-DFT is given in Refs. We performed NEGF-DFT for  $(\text{CHO}_2)_2\text{Ph}_2$  junction. In Figure S5, the plot of calculated  $T_e(E)$  is shown around  $E_F$ . Using calculated  $T_e(E)$  and Eqs (S5) and (S6), we found that  $\kappa_e(T = 300\text{K})$  was  $1.72 \times 10^{-1}$  pW/K.

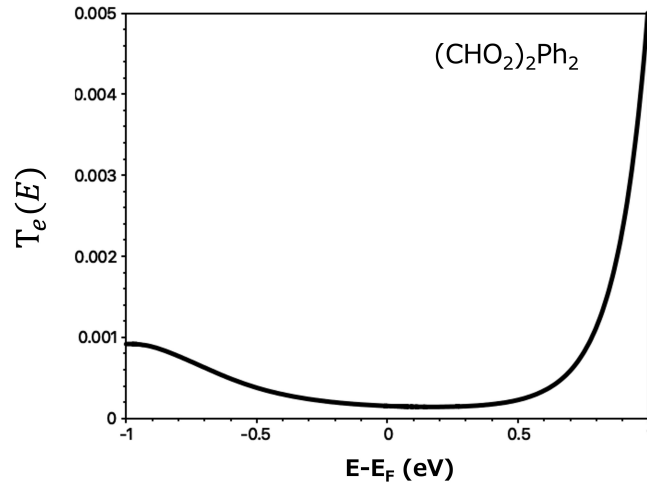

**Figure S5.** Plots of the transmission coefficient of electric transmission coefficient of  $(\text{CHO}_2)_2\text{Ph}_2$  junction calculated by NEGF-DFT with ballistic approximation.

## S6. Transmission coefficient of elastic term of forward and backward direction

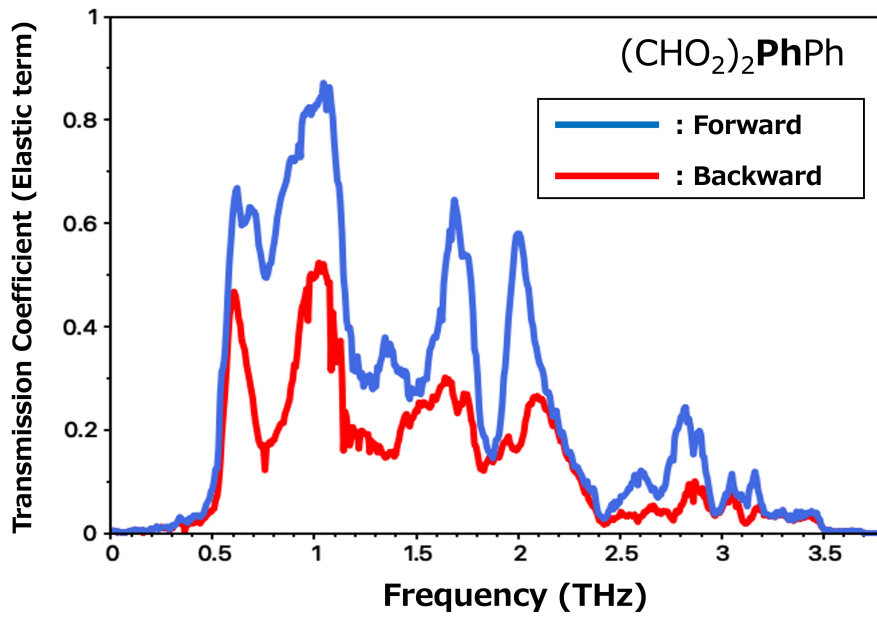

**Figure S6.** Plots of the transmission coefficient of elastic term,  $\mathcal{T}^{ela}$ , of  $(\text{CHO}_2)_2\text{PhPh}$  junction. The blue line is the result of positive temperature bias, i.e.,  $\text{D}^{\text{H}}$  side is connected low temperature electrode. The red line represents  $\mathcal{T}^{ela}$  for negative temperature bias, i.e.,  $\text{D}^{\text{H}}$  side is in high temperature regime and reduction of the transmission coefficient is enhanced by dephasing effect of anharmonicity.

## References

- (1) Soler, J. M.; Artacho, E.; Gale, J. D.; García, A.; Junquera, J.; Ordejón, P.; Sánchez-Portal, D. The SIESTA method for *ab initio* order-*N* materials simulation. *Journal of Physics-Condensed Matter* **2002**, *14* (11), 2745-2779. DOI: 10.1088/0953-8984/14/11/302.
- (2) Bergfield, J. P.; Stafford, C. A. Thermoelectric signatures of coherent transport in single-molecule heterojunctions. *Nano Lett* **2009**, *9* (8), 3072-3076. DOI: 10.1021/nl901554s From NLM PubMed-not-MEDLINE.
